# Supplementary material for: Mechanical force-induced luminescence enhancement and chromism of a nonplanar D–A phenothiazine derivative
Source: Royal Society of Chemistry journal article supplement (doi:10.1039/c6tc01193d), 2016-01-01
Supplement: c6tc01193d1.pdf [file c6tc01193d1.pdf]

## **Mechanical force-induced luminescent enhancement and chromism of a nonplanar D-A phenothiazine derivative**

Pengchong Xue,<sup>\*</sup> Jipeng Ding, Panpan Wang, Boqi Yao, Jiabao Sun, Jingbo Sun, Ran Lu

College of Chemistry, Jilin University, 2519# Jiefang Road, Changchun, P.R. China

E-mail: xuepengchong@jlu.edu.cn

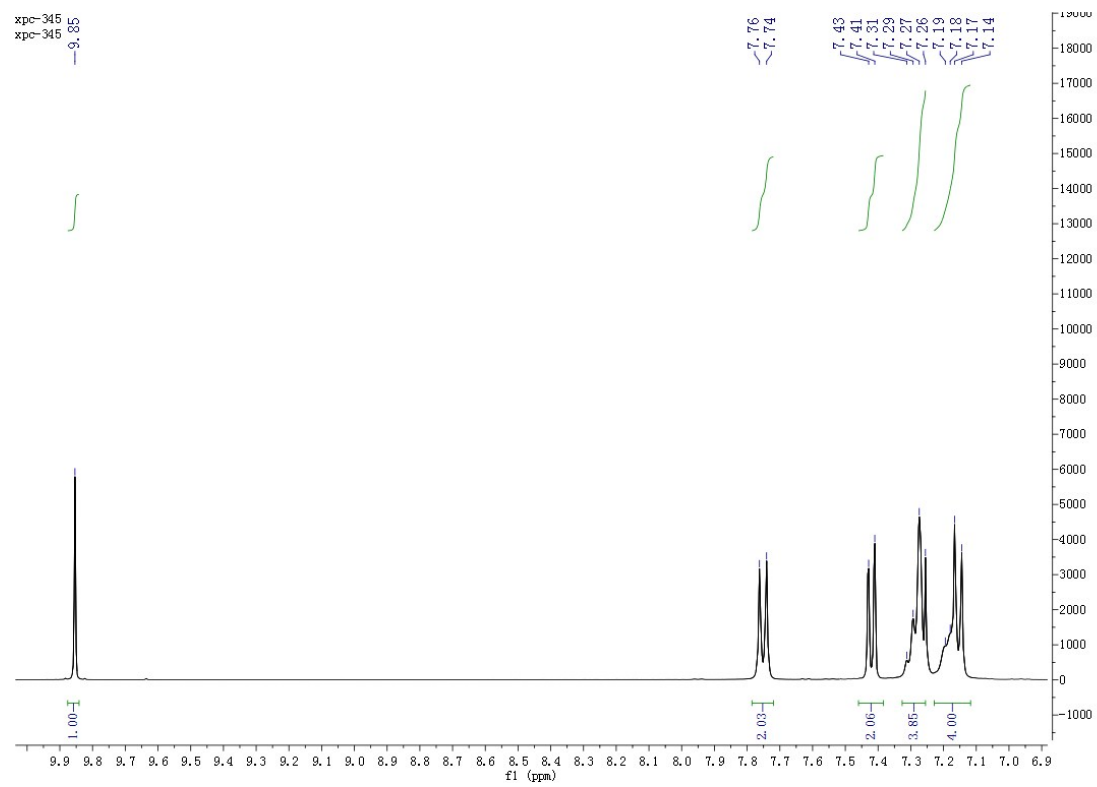

**Fig. S1** <sup>1</sup>H NMR of PBA in CDCl<sub>3</sub>.

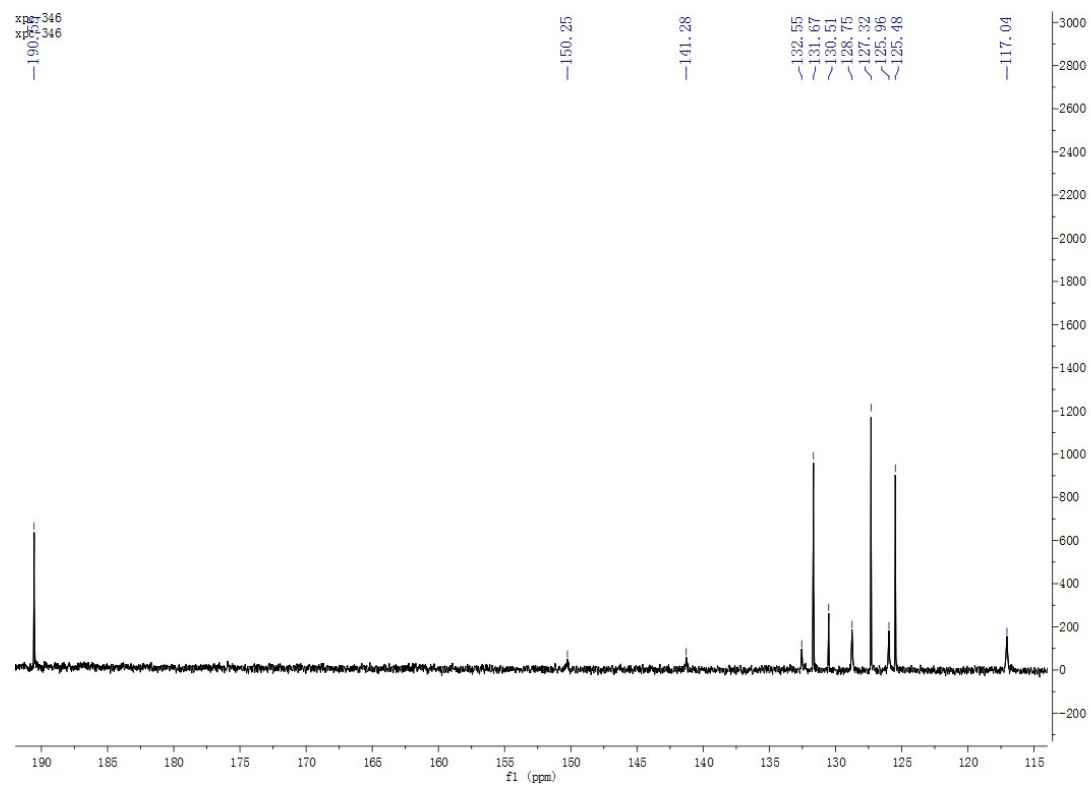

**Fig. S2**  $^{13}\text{C}$  NMR of PBA in  $\text{CDCl}_3$ .

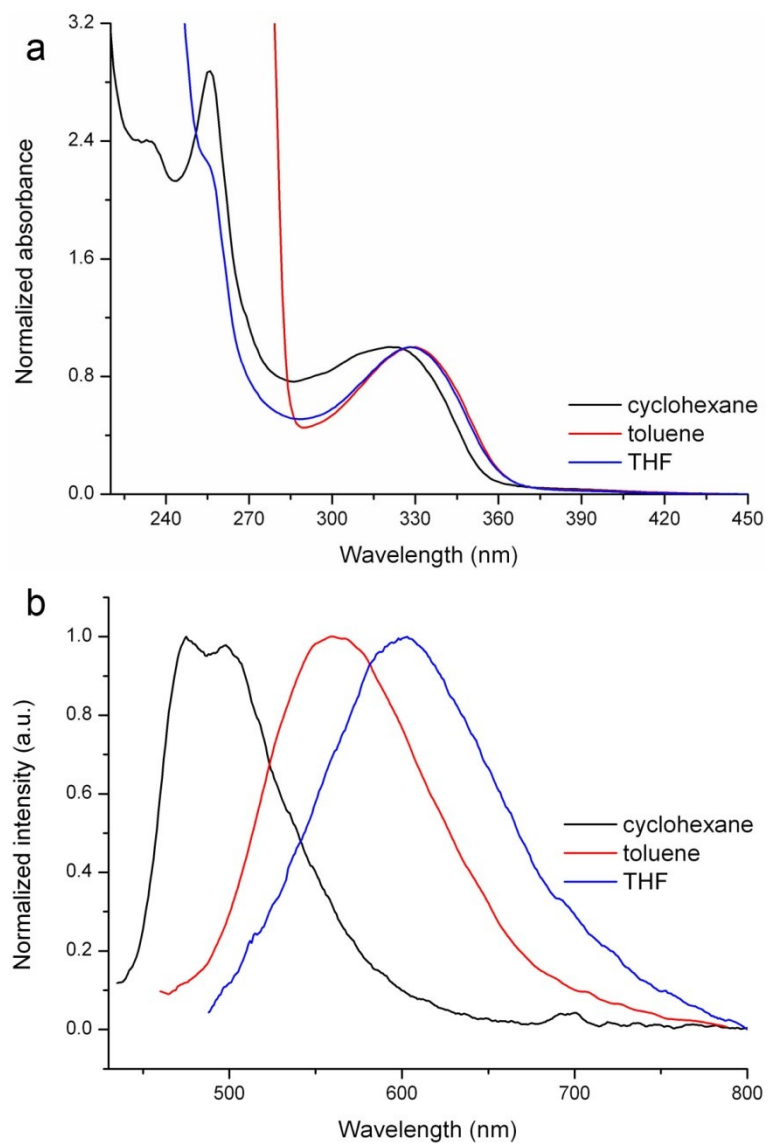

**Fig. S3** Absorption (a) and fluorescence (b) spectra of **PBA** in different solvents.  $\lambda_{\text{ex}} = 340$  nm.

**Table S1.** Computed vertical excitation spectra of **PBA** in Form A based on the optimal structure at ground state.

| Excited State             | Transition                                                                                                                                                                                           | Bandgap (eV) | Absorption (nm)  | Oscillator strength |
|---------------------------|------------------------------------------------------------------------------------------------------------------------------------------------------------------------------------------------------|--------------|------------------|---------------------|
| Triplet (T <sub>1</sub> ) | HOMO–LUMO (96.7%)                                                                                                                                                                                    | 2.7086       | 457.74           | 0.0000              |
| Singlet (S <sub>1</sub> ) | HOMO–LUMO (98.8%)                                                                                                                                                                                    | 2.7360       | 453.17           | 0.0049              |
| Triplet (T <sub>2</sub> ) | HOMO–4–LUMO (92.2%); HOMO–4–LUMO+6 (6.8%)                                                                                                                                                            | 3.0942       | 400.70           | 0.0000              |
| Triplet (T <sub>3</sub> ) | HOMO–2–LUMO+5 (3.9%); HOMO–1–LUMO+4 (4.2%);<br>HOMO–LUMO+1 (29.9%) HOMO–LUMO+2 (39.1%);<br>HOMO–LUMO+3 (14.9%)                                                                                       | 3.2217       | 384.84           | 0.0000              |
| Triplet (T <sub>4</sub> ) | HOMO–6–LUMO+1 (12.2%); HOMO–5–LUMO (65.2%)<br>HOMO–3–LUMO (8.3%); HOMO–1–LUMO (4.1%)                                                                                                                 | 3.4829       | 355.98           | 0.0000              |
| Triplet (T <sub>5</sub> ) | HOMO–3–LUMO+4 (2.6%); HOMO–2–LUMO+1 (2.6%)<br>HOMO–2–LUMO+2 (6.2%); HOMO–1–LUMO+3 (5.2%)<br>HOMO–LUMO+1 (4.0%) HOMO–LUMO+2 (25.8%)<br>HOMO–LUMO+3 (32.3%) HOMO–LUMO+5 (13.1%)                        | 3.5110       | 353.13           | 0.0000              |
| Singlet (S <sub>2</sub> ) | HOMO–LUMO+1 (94.2%); HOMO–LUMO+2 (3.5%)                                                                                                                                                              | 3.6460       | 340.06<br>453.17 | 0.0010              |
| Triplet (T <sub>6</sub> ) | HOMO–LUMO+1 (48.8%); HOMO–LUMO+2 (10.9%)<br>HOMO–LUMO+3 (5.5%); HOMO–LUMO+4 (15.5%)<br>HOMO–LUMO+5 (5.2%)                                                                                            | 3.7039       | 334.74           | 0.0000              |
| Triplet (T <sub>7</sub> ) | HOMO–3–LUMO+4 (7.0%); HOMO–2–LUMO+2 (3.1%)<br>HOMO–1–LUMO (6.2%); HOMO–1–LUMO+2 (2.2%)<br>HOMO–1–LUMO+3 (7.9%); HOMO–LUMO+1 (3.4%)<br>HOMO–LUMO+2 (4.5%); HOMO–LUMO+3 (33.1%)<br>HOMO–LUMO+3 (23.8%) | 3.7261       | 332.74           | 0.0000              |
| Triplet (T <sub>7</sub> ) | HOMO–5–LUMO (2.6%); HOMO–1–LUMO (85.9%)<br>HOMO–LUMO+5 (2.7%)                                                                                                                                        | 3.7668       | 32.15            | 0.0000              |
| Singlet (S <sub>3</sub> ) | HOMO–4–LUMO (2.1%); HOMO–1–LUMO (96.1%)                                                                                                                                                              | 3.7696       | 328.90           | 0.0025              |
| Singlet (S <sub>4</sub> ) | HOMO–LUMO+1 (4.4%); HOMO–LUMO+2 (70.1%)<br>HOMO–LUMO+3 (22.4%)                                                                                                                                       | 3.9672       | 312.52           | 0.0023              |
| Singlet (S <sub>5</sub> ) | HOMO–LUMO+2 (22.4%); HOMO–LUMO+3 (71.7%)                                                                                                                                                             | 4.1546       | 298.43           | 0.0187              |
| Singlet (S <sub>5</sub> ) | HOMO–1–LUMO+1 (4.2%); HOMO–1–LUMO+2 (6.0%)<br>HOMO–LUMO+3 (86.1%);                                                                                                                                   | 4.3534       | 284.80           | 0.0578              |
| Singlet (S <sub>6</sub> ) | HOMO–2–LUMO (98.2%)                                                                                                                                                                                  | 4.5246       | 274.02           | 0.0057              |
| Singlet (S <sub>7</sub> ) | HOMO–3–LUMO (95.8%)                                                                                                                                                                                  | 4.6305       | 267.75           | 0.0179              |
| Singlet (S <sub>8</sub> ) | HOMO–LUMO (91.6%); HOMO–LUMO (3.2%)                                                                                                                                                                  | 4.7447       | 261.31           | 0.0516              |

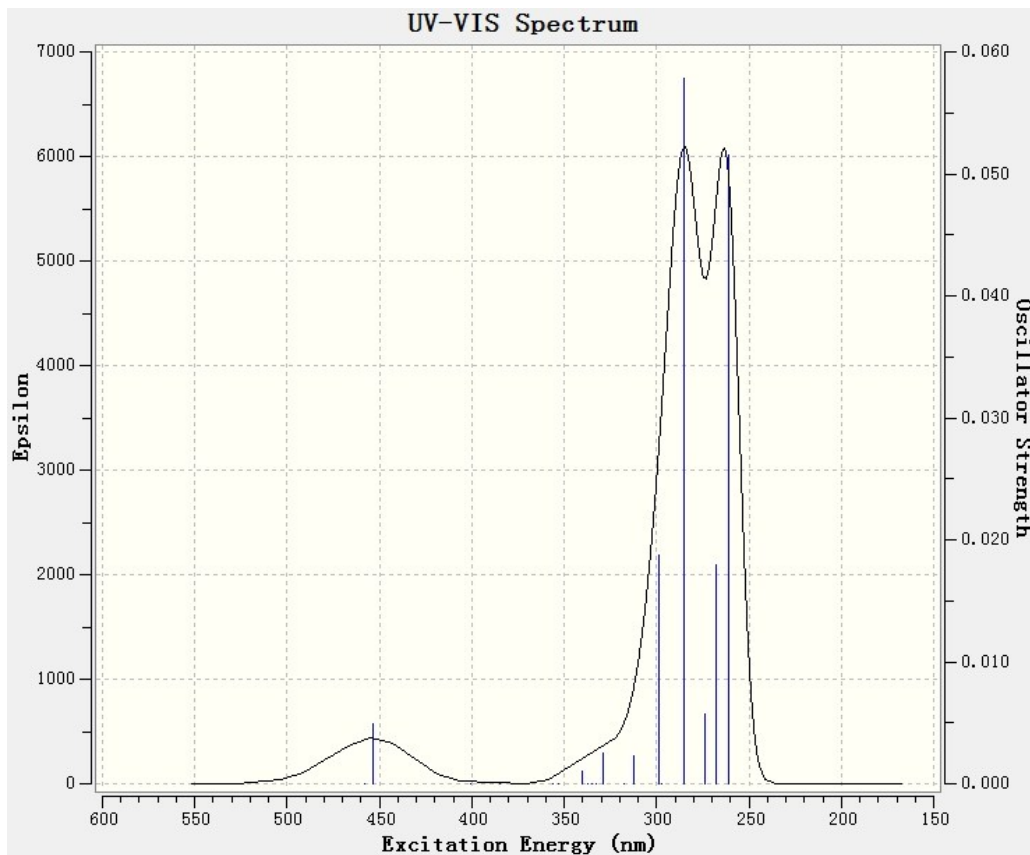

Fig. S4 Stimulated UV-Vis spectra of Form A.

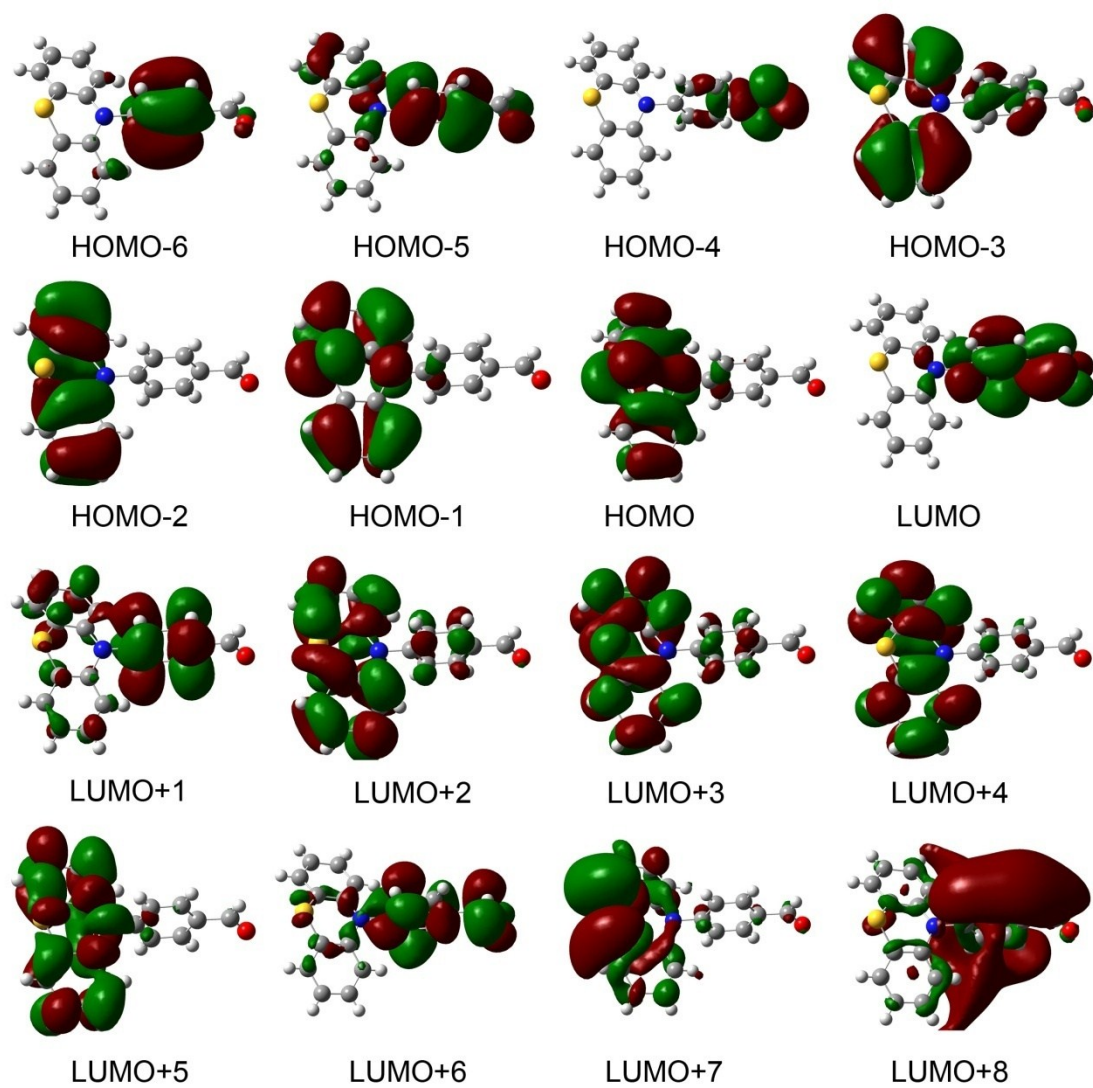

Fig. S5 Frontier molecular orbitals of Form A.

**Table S2.** Computed vertical excitation spectra of **PBA** in Form B based on the optimal structure at ground state.

| Excited State             | Transition                                                                                                                                                                                                                                   | Bandgap (eV) | Absorption (nm) | Oscillator strength |
|---------------------------|----------------------------------------------------------------------------------------------------------------------------------------------------------------------------------------------------------------------------------------------|--------------|-----------------|---------------------|
| Triplet (T <sub>1</sub> ) | HOMO-5–LUMO (3.2%) HOMO-1–LUMO (6.6%)<br>HOMO–LUMO (81.8%)                                                                                                                                                                                   | 2.8866       | 429.51          | 0.0000              |
| Triplet (T <sub>2</sub> ) | HOMO-2–LUMO (84.8%) HOMO-2–LUMO+1 (3.5%)<br>HOMO-2–LUMO+4 (5.2%) HOMO-2–LUMO+8 (5.2%)                                                                                                                                                        | 3.2812       | 381.02          | 0.0000              |
| Triplet (T <sub>3</sub> ) | HOMO-6–LUMO+2 (6.9%) HOMO-5–LUMO (3.7%)<br>HOMO-5–LUMO+1 (5.5%) HOMO-4–LUMO+2 (4.0%)<br>HOMO-4–LUMO+3 (6.2%) HOMO-1–LUMO (3.7%)<br>HOMO-1–LUMO+1 (9.4%) HOMO-1–LUMO+4 (7.5%)<br>HOMO–LUMO+1 (6.9%) HOMO–LUMO+3 (5.1%)<br>HOMO–LUMO+4 (27.0%) | 3.4564       | 358.71          | 0.0000              |
| Triplet (T <sub>4</sub> ) | HOMO-6–LUMO+1 (98.8%) HOMO-6–LUMO+4 (7.5%)<br>HOMO-6–LUMO+3 (2.9%) HOMO-5–LUMO (4.5%)<br>HOMO-4–LUMO+1 (3.7%) HOMO-4–LUMO+4 (4.1%)<br>HOMO-1–LUMO+2 (5.9%) HOMO–LUMO+2 (25.1%)<br>HOMO–LUMO+3 (13.1%)                                        | 3.4870       | 355.56          | 0.0000              |
| Singlet (S <sub>1</sub> ) | HOMO-2–LUMO (85.1%) HOMO-2–LUMO+1 (2.7%)<br>HOMO-2–LUMO+4 (3.9%) HOMO-2–LUMO+8 (2.6%)<br>HOMO–LUMO (4.4%)                                                                                                                                    | 3.7799       | 328.01          | 0.0159              |
| Triplet (T <sub>5</sub> ) | HOMO-6–LUMO+2 (2.2%) HOMO-1–LUMO+1 (9.1%)<br>HOMO-1–LUMO+4 (3.3%) HOMO–LUMO+1 (78.6%)                                                                                                                                                        | 3.8107       | 325.36          | 0.0000              |
| Singlet (S <sub>2</sub> ) | HOMO-2–LUMO (4.1%) HOMO–LUMO (74.0%) HOMO–<br>LUMO+1 (29.0%) HOMO–LUMO+4 (11.4%)                                                                                                                                                             | 3.8501       | 322.03          | 0.3274              |
| Triplet (T <sub>6</sub> ) | HOMO-1–LUMO+5 (2.8%) HOMO–LUMO+2 (18.5%)<br>HOMO–LUMO+3 (49.8%) HOMO–LUMO+4 (10.0%)<br>HOMO–LUMO+5 (12.4%)                                                                                                                                   | 3.8517       | 321.89          | 0.0000              |
| Triplet (T <sub>7</sub> ) | HOMO-6–LUMO+3 (3.5%) HOMO-6–LUMO+5 (2.2%)<br>HOMO-5–LUMO+1 (8.9%) HOMO-1–LUMO (30.0%)<br>HOMO–LUMO +1(28.0%) HOMO–LUMO (4.8%) HOMO–<br>LUMO+1 (3.5%) HOMO–LUMO+4 (10.7%)                                                                     | 4.0153       | 308.78          | 0.0000              |
| Singlet (S <sub>3</sub> ) | HOMO–LUMO+2 (88.1%) HOMO–LUMO+3 (7.1%)                                                                                                                                                                                                       | 4.1064       | 301.93          | 0.0015              |
| Singlet (S <sub>4</sub> ) | HOMO–LUMO (11.7%) HOMO–LUMO+1 (73.5%) HOMO–<br>LUMO+4 (8.5%)                                                                                                                                                                                 | 4.1354       | 299.81          | 0.0890              |
| Singlet (S <sub>5</sub> ) | HOMO-3–LUMO (2.5%) HOMO–LUMO+2 (76.2%) HOMO–<br>LUMO+3 (81.5%) HOMO–LUMO+4 (5.2%)                                                                                                                                                            | 4.2193       | 293.85          | 0.0104              |
| Singlet (S <sub>6</sub> ) | HOMO-1–LUMO (52.5%) HOMO-1–LUMO+1 (2.2%)<br>HOMO–LUMO+1 (3.7%) HOMO–LUMO+4 (36.6%)                                                                                                                                                           | 4.3293       | 286.38          | 0.0004              |
| Singlet (S <sub>7</sub> ) | HOMO-1–LUMO (38.9%) HOMO–LUMO (4.8%) HOMO–<br>LUMO+3 (4.0%) HOMO–LUMO+4 (41.8%) HOMO–                                                                                                                                                        | 4.3388       | 285.76          | 0.0999              |



|                            |                                                                                                                                             |        |        |        |
|----------------------------|---------------------------------------------------------------------------------------------------------------------------------------------|--------|--------|--------|
|                            | LUMO+5 (2.0%)                                                                                                                               |        |        |        |
| Singlet (S <sub>8</sub> )  | HOMO-3-LUMO (20.5%) HOMO-1-LUMO+2 (3.7%)<br>HOMO-1-LUMO+3 (5.9%) HOMO-LUMO+5 (58.2%)                                                        | 4.5064 | 275.13 | 0.0064 |
| Singlet (S <sub>9</sub> )  | HOMO-1-LUMO (4.7%) HOMO-1-LUMO+1 (88.8%)                                                                                                    | 4.5383 | 273.20 | 0.0500 |
| Singlet (S <sub>10</sub> ) | HOMO-3-LUMO+1 (2.4%) HOMO-1-LUMO (4.6%) HOMO-1-LUMO+2 (68.7%) HOMO-1-LUMO+3 (8.9%) HOMO-LUMO+6 (2.2%) HOMO-LUMO+5 (5.2%) HOMO-LUMO+6 (2.5%) | 4.6313 | 267.71 | 0.1078 |

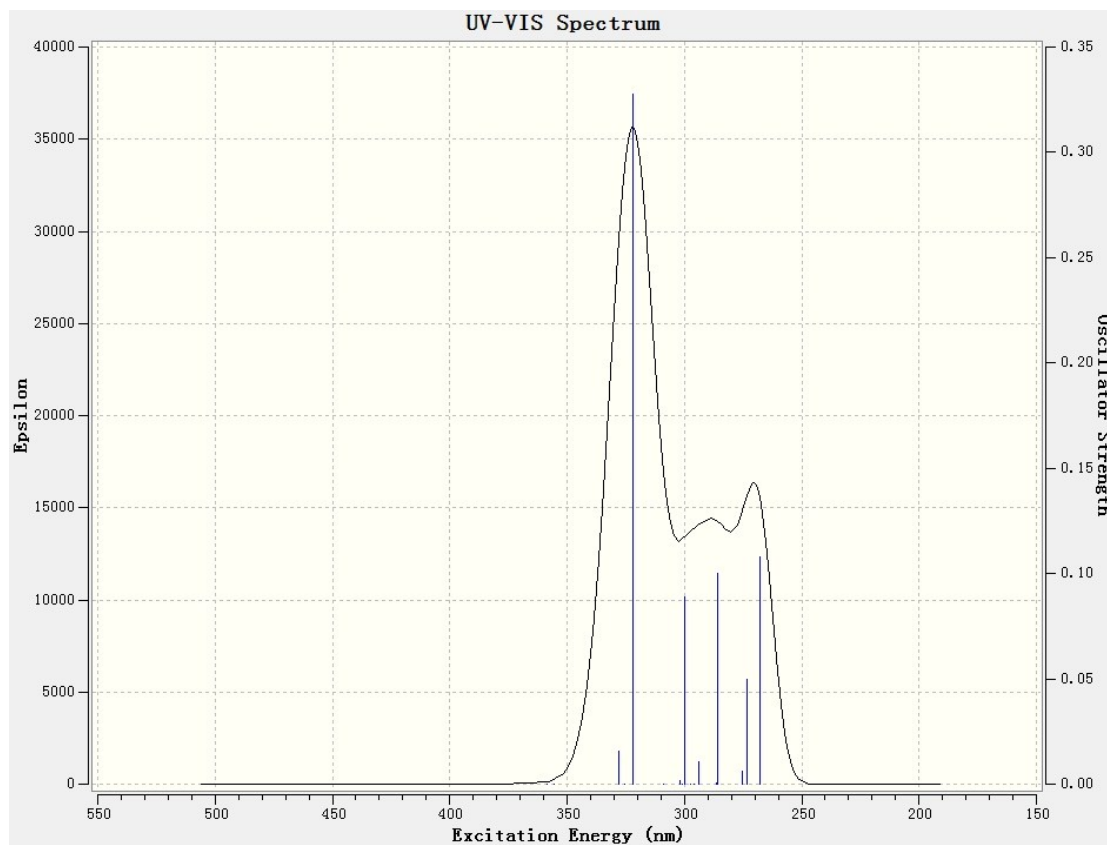

Fig. S6 Stimulated UV-Vis spectra of Form A.

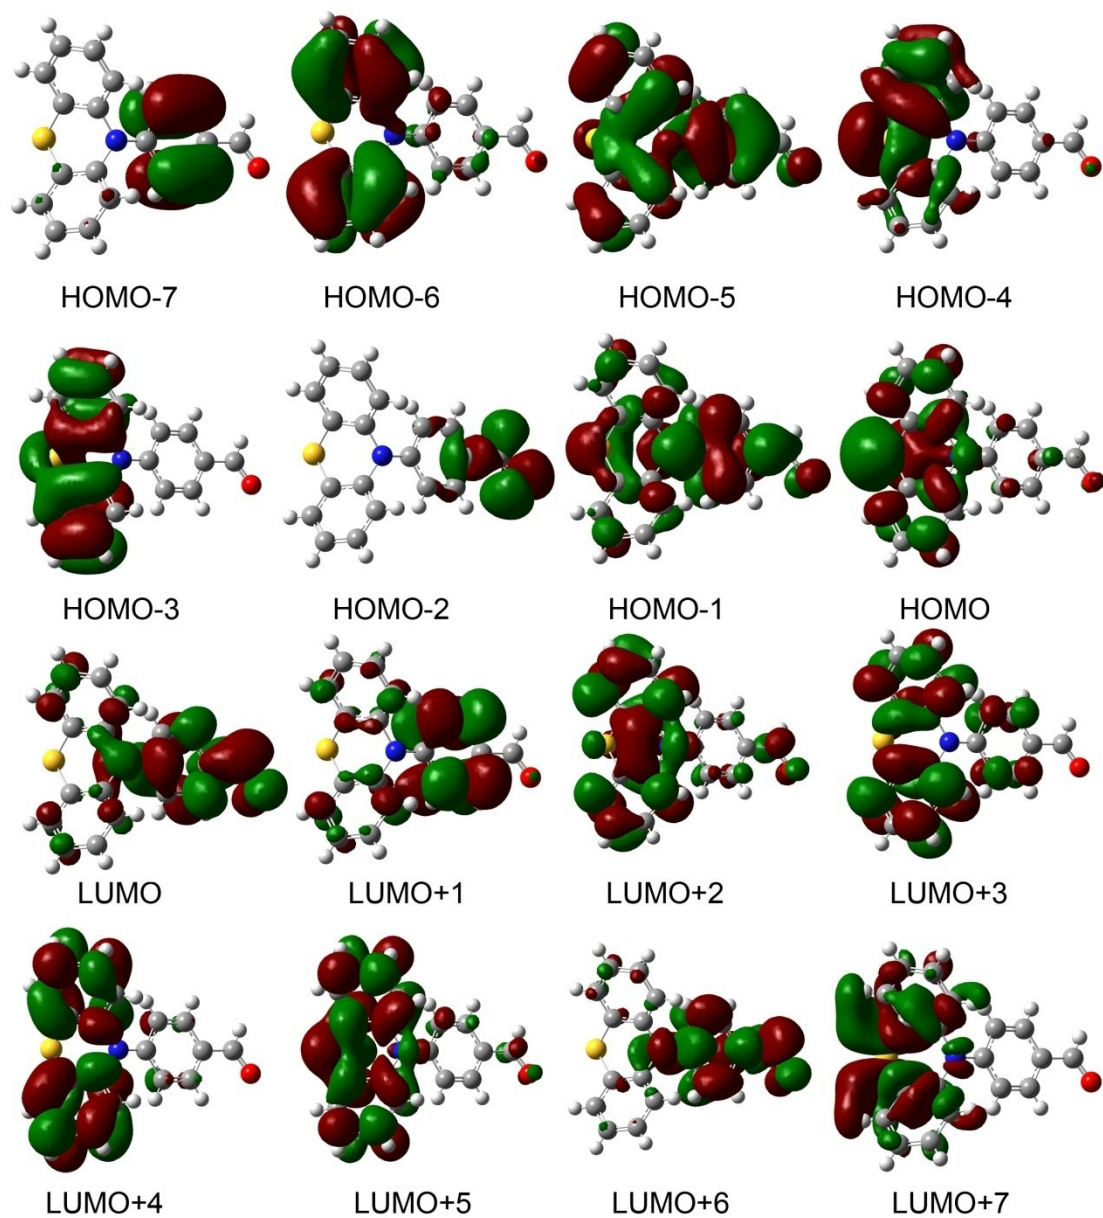

**Fig. S7** Frontier molecular orbitals of Form B.

**Table S3.** Computed vertical excitation spectra of **PBA** in Form B in THF based on the optimal structure at ground state.

| Excited State             | Transition                                                                                 | Bandgap<br>(eV) | Absorption<br>(nm) | Oscillator<br>strength |
|---------------------------|--------------------------------------------------------------------------------------------|-----------------|--------------------|------------------------|
| Singlet (S <sub>1</sub> ) | HOMO-1-LUMO (6.0%) ; HOMO-LUMO (85.6%)<br>HOMO-LUMO+1 (8.4%)                               | 3.6955          | 335.50             | 0.3401                 |
| Singlet (S <sub>2</sub> ) | HOMO-2-LUMO (87.7%) ; HOMO-2-LUMO+1 (5.0%);<br>HOMO-2-LUMO+4 (2.5%) ; HOMO-2-LUMO+8 (4.8%) | 3.7652          | 329.29             | 0.0216                 |

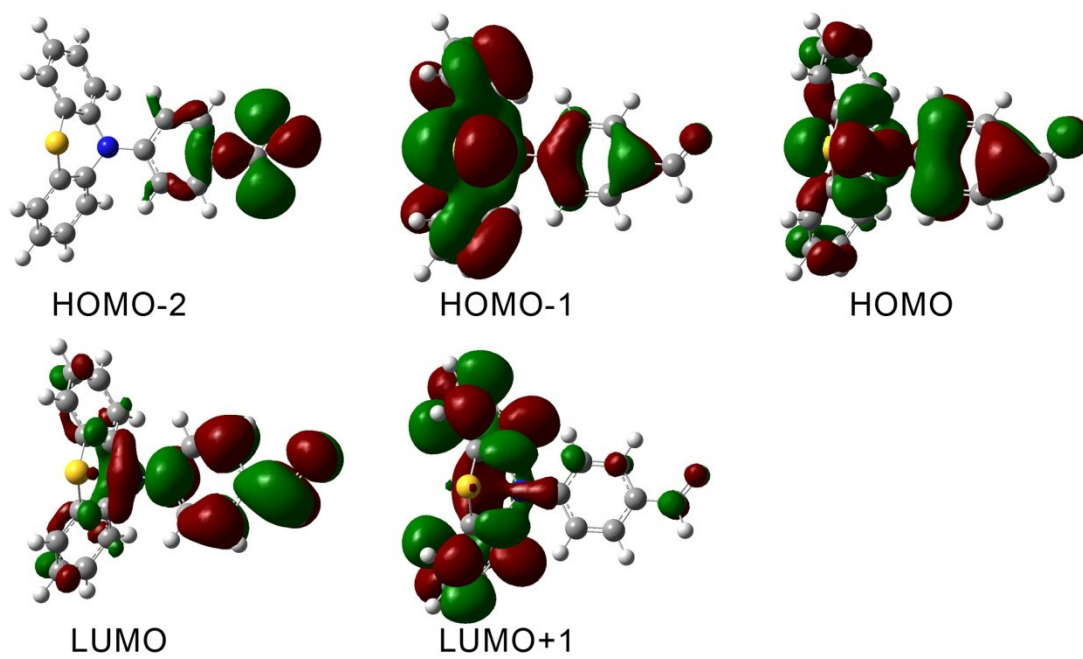

**Fig. S8** Frontier molecular orbitals of Form B in THF.

**Table S4.** Computed vertical excitation spectra of **PBA** in Form B based on the structure in crystal.

| Excited State             | Transition                                                         | Bandgap<br>(eV) | Absorption<br>(nm) | Oscillator<br>strength |
|---------------------------|--------------------------------------------------------------------|-----------------|--------------------|------------------------|
| Singlet (S <sub>1</sub> ) | HOMO–LUMO (95.7%); HOMO–LUMO+1 (4.3%)                              | 3.7277          | 332.60             | 0.5236                 |
| Singlet (S <sub>2</sub> ) | HOMO-2–LUMO (100%);<br>HOMO-2–LUMO+4 (2.5%) ; HOMO-2–LUMO+8 (4.8%) | 3.8714          | 320.26             | 0.0072                 |
| Singlet (S <sub>3</sub> ) | HOMO-1–LUMO (60.4%) ; HOMO–LUMO+1 (39.6%);                         | 4.1970          | 295.41             | 0.0404                 |

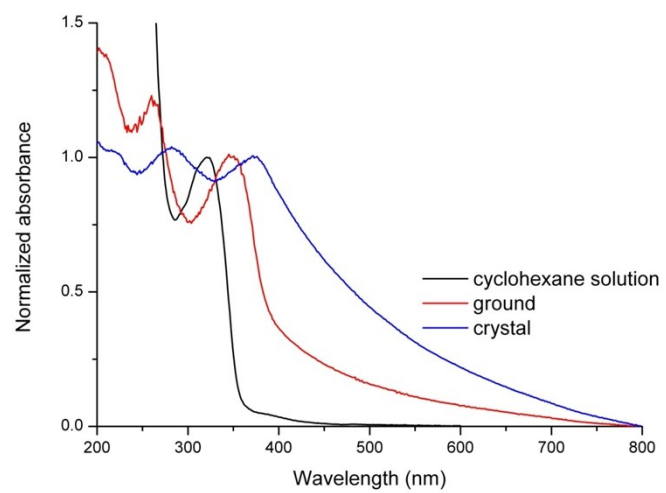

**Fig. S9** UV-vis absorption spectra of solution, crystal and ground powders.

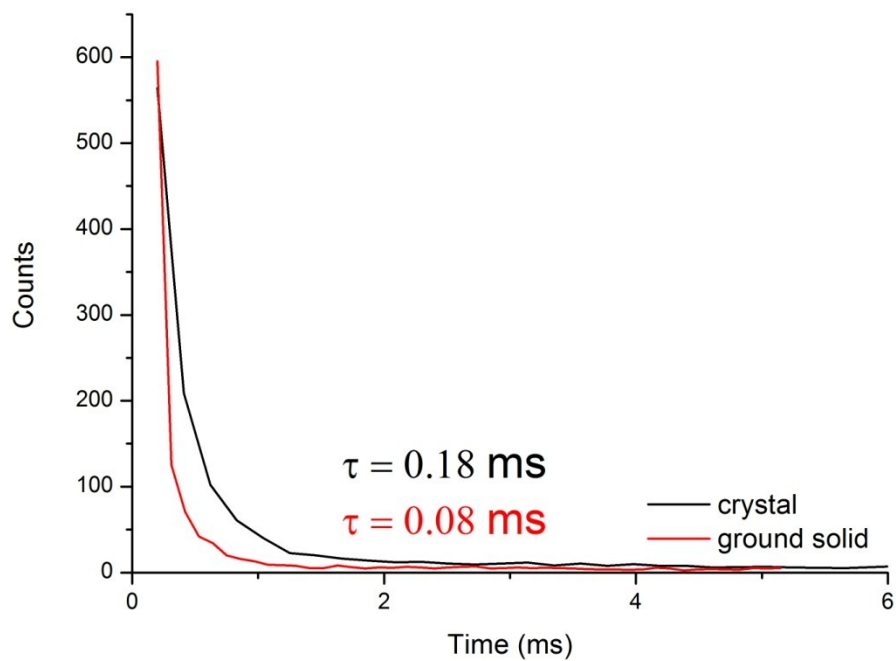

**Fig. S10** Decay curves of **PBA** in crystal ( $\lambda_{\text{em}} = 550 \text{ nm}$ ) and ground solid ( $\lambda_{\text{em}} = 570 \text{ nm}$ ).



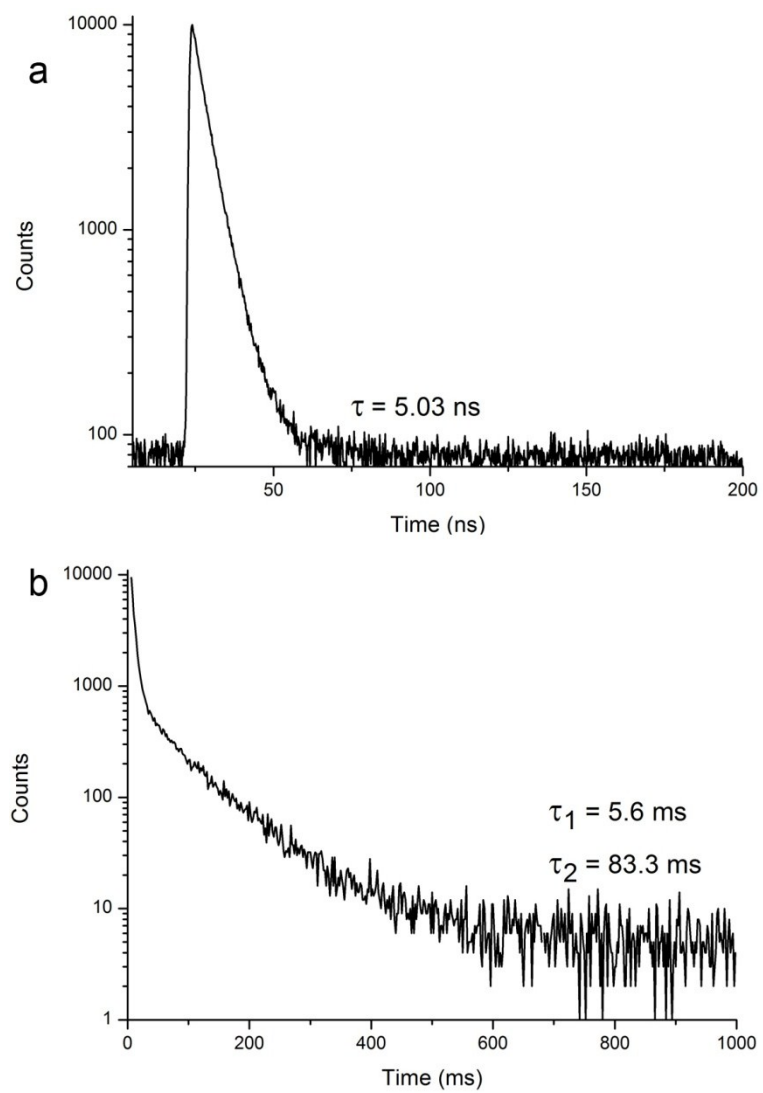

**Fig. S11** Decay curves of PBA crystal at (a) 490 nm and (b) 550 nm with a delayed time of 0.5 ms.
